# Supplementary material for: A Comprehensive Study of Cyanobacterial Morphological and Ecological Evolutionary Dynamics through Deep Geologic Time
Source: PubMed Central journal article supplement (PMC5029880; doi:10.1371/journal.pone.0162539), 2016-09-20
Supplement: pone.0162539.s005.pdf [file pone.0162539.s005.pdf]

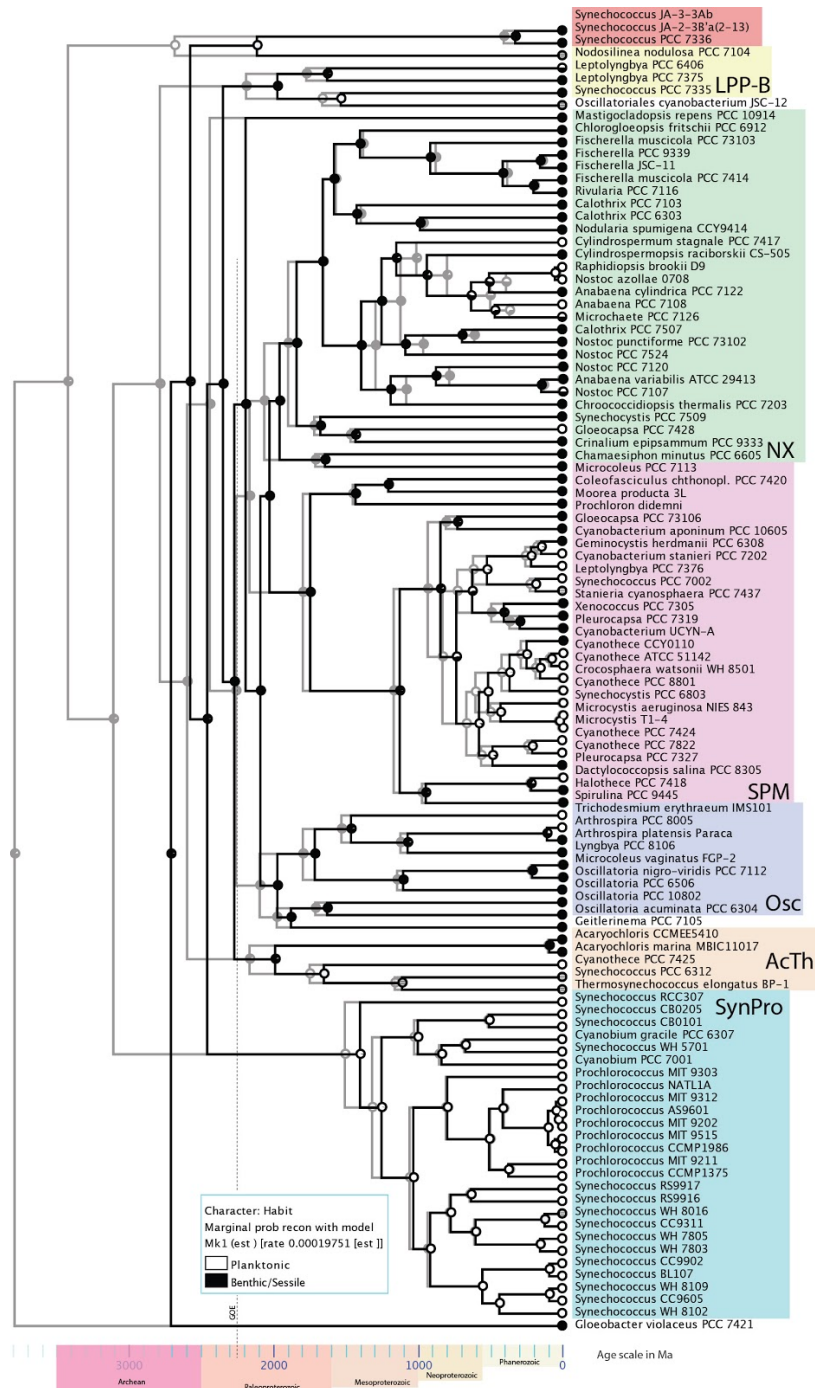

S3 Fig. Ancestral State Reconstruction of Growth Habit Showing Shift in Ages Given Different Root Maximum Age Assumptions.
