# Supplementary material for: A Comprehensive Study of Cyanobacterial Morphological and Ecological Evolutionary Dynamics through Deep Geologic Time
Source: PubMed Central journal article supplement (PMC5029880; doi:10.1371/journal.pone.0162539), 2016-09-20
Supplement: pone.0162539.s015.pdf [file pone.0162539.s015.pdf]

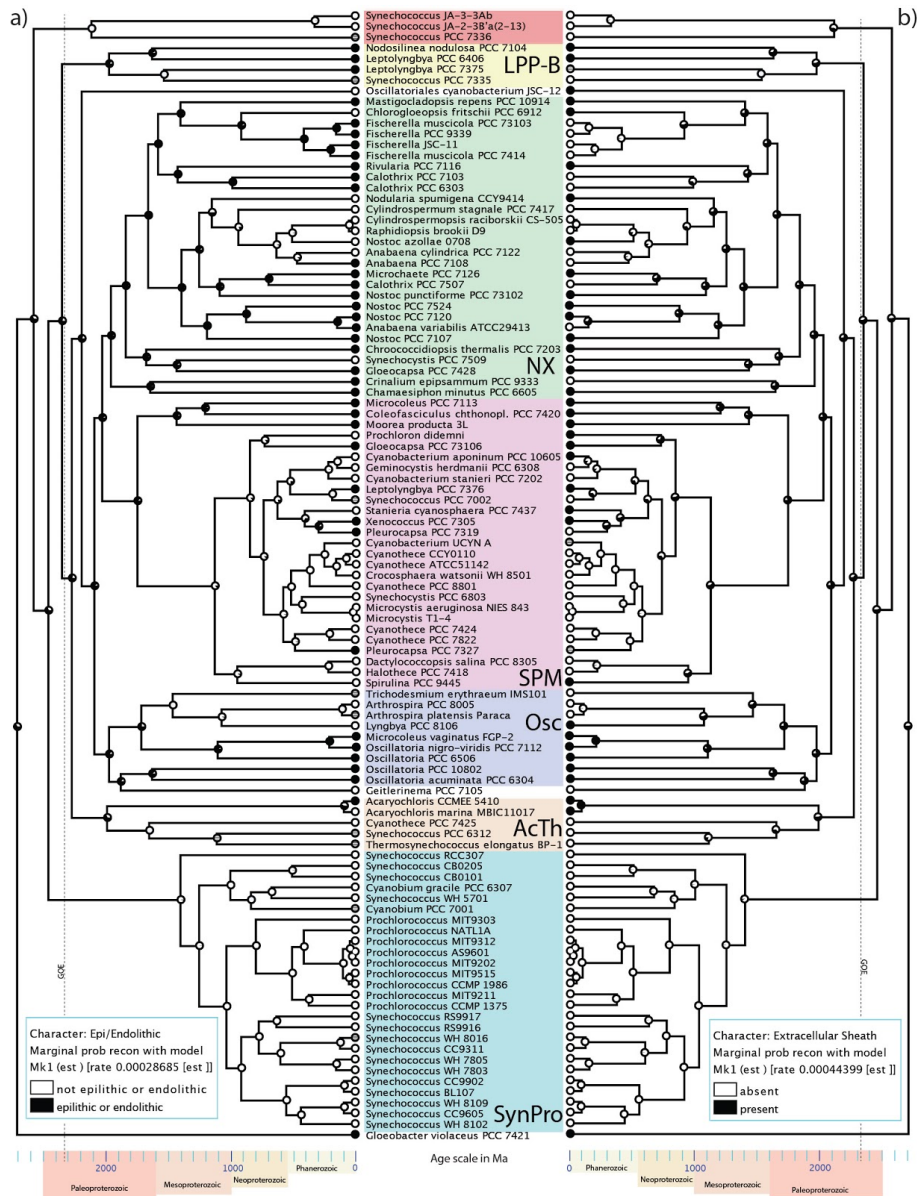

S14 Fig. Ancestral state reconstruction of epi/endolithic and the extracellular sheath.
