# Supplementary material for: A Comprehensive Study of Cyanobacterial Morphological and Ecological Evolutionary Dynamics through Deep Geologic Time
Source: PubMed Central journal article supplement (PMC5029880; doi:10.1371/journal.pone.0162539), 2016-09-20
Supplement: pone.0162539.s019.pdf [file pone.0162539.s019.pdf]

**S1 Table. Epoch model fits and phylogenetic signal for phylogenies time-calibrated to a maximum root age of 3.8 Ga.**

| Trait                      | $\Delta \ln L^\ddagger$ | Shift Age (Ga) <sup>+</sup> | Shift cluster   |
|----------------------------|-------------------------|-----------------------------|-----------------|
| Filamentous morphology     | 4.06                    | 1.8                         | Mesoproterozoic |
| Nitrogen fixation          | 1.69                    | 1.8                         | Mesoproterozoic |
| Uniseriate trichomes       | 5.62                    | 1.7                         | Mesoproterozoic |
| Hormogonia                 | 3.05                    | 1.7                         | Mesoproterozoic |
| Motility                   | 3.00                    | 1.7                         | Mesoproterozoic |
| Heterocysts                | 3.66                    | 1.7                         | Mesoproterozoic |
| Fission in multiple planes | 3.59                    | 1.6                         | Mesoproterozoic |
| Gas vesicles               | 2.07                    | 1.6                         | Mesoproterozoic |
| False branching            | 1.35                    | 1.6                         | Mesoproterozoic |
| Freshwater habitat         | 1.53                    | 1.1                         |                 |
| Baeocytes                  | 3.02                    | 1.0                         |                 |
| Akinetes                   | 2.36                    | 1.0                         |                 |
| Thermophilic               | 2.19                    | 0.9                         |                 |
| Multiseriate trichomes     | 3.13                    | 0.7                         | Neoproterozoic  |
| Marine planktonic          | 1.65                    | 0.6                         | Neoproterozoic  |
| True branching             | 1.43                    | 0.6                         | Neoproterozoic  |
| Extracellular sheath       | 3.98                    | 0.5                         | Neoproterozoic  |
| Growth habit               | 1.65                    | 0.6                         | Neoproterozoic  |
| Free-living                | 2.64                    | 0.5                         | Neoproterozoic  |
| Epiphytic                  | 0.57                    | 0.5                         | Neoproterozoic  |
| Periphytic                 | 1.04                    | 0.2                         |                 |
| Cell diameter              | 2.81                    | 0.1                         |                 |
| Microbial mats             | 2.70                    | 0.1                         |                 |
| Mucilage                   | 1.53                    | 0.1                         |                 |

<sup>‡</sup> Difference between best-fit epoch model and a constant rate model

<sup>+</sup> Age indicates the best estimate of the timing of a shift under an epoch model.
