# Supplementary material for: A Comprehensive Study of Cyanobacterial Morphological and Ecological Evolutionary Dynamics through Deep Geologic Time
Source: PubMed Central journal article supplement (PMC5029880; doi:10.1371/journal.pone.0162539), 2016-09-20
Supplement: pone.0162539.s020.pdf [file pone.0162539.s020.pdf]

**S2 Table. Ranges for estimated node ages<sup>†</sup> for major cyanobacterial clades from different taxon sets.**

| Clade                                | Age Constraints |        | Taxon              | Taxon              | Taxon              | Taxon              | Eon        |
|--------------------------------------|-----------------|--------|--------------------|--------------------|--------------------|--------------------|------------|
|                                      | Minage          | Maxage | Set 1              | Set 2              | Set 3              | Set 4              |            |
| Cyanobacteria                        | 2.320           | 2.700  | 2.699 <sup>‡</sup> | 2.699 <sup>‡</sup> | 2.699 <sup>‡</sup> | 2.699 <sup>‡</sup> | Archean    |
| SynPro basal node                    |                 |        | 2.443±0.021        | 2.415±0.027        | 2.398±0.026        | 2.456±0.022        | Paleoprot. |
| SynPro clade                         |                 |        | 1.410±0.171        | 1.378±0.162        | 1.256±0.152        | 1.430±0.146        | Mesoprot.  |
| <i>Synechococcus-Prochlorococcus</i> |                 |        | 0.982±0.171        | 0.953±0.164        | 0.889±0.144        | 0.1003±0.146       | Neoprot.   |
| <i>Synechococcus</i>                 |                 |        | 0.849±0.156        | 0.835±0.151        | 0.787±0.133        | 0.885±0.136        | Neoprot.   |
| <i>Prochlorococcus</i>               |                 |        | 0.744±0.143        | 0.731±0.139        | 0.677±0.118        | 0.763±0.123        | Neoprot.   |
| <i>Cyanobia</i>                      |                 |        | 0.972±0.157        | 0.968±0.153        | 0.868±0.133        | 0.983±0.134        | Neoprot.   |
| LPP basal node                       |                 |        | 2.246±0.025        | 2.293±0.034        | 2.292±0.027        | 2.261±0.027        | Paleoprot. |
| LPP                                  |                 |        | 1.910±0.027        | 2.031±0.040        | 1.946±0.032        | 1.943±0.031        | Paleoprot. |
| Ac-Th basal node                     |                 |        | 2.105±0.023        | 2.204±0.036        | 2.219±0.027        | 2.113±0.027        | Paleoprot. |
| Ac-Th                                |                 |        | 1.595±0.024        | 2.082±0.036        | 1.934±0.029        | 1.965±0.026        | Paleoprot. |
| Osc-SPM-NX                           |                 |        | 2.028±0.021        | 2.058±0.033        | 2.045±0.026        | 1.988±0.024        | Paleoprot. |
| Osc                                  |                 |        | 1.914±0.021        | 1.916±0.032        | 1.932±0.027        | 1.869±0.024        | Paleoprot. |
| SPM-NX                               |                 |        | 1.973±0.020        | 2.000±0.031        | 1.992±0.025        | 1.942±0.022        | Paleoprot. |
| SPM                                  |                 |        | 1.770±0.036        | 1.795±0.049        | 1.778±0.046        | 1.713±0.040        | Paleoprot. |
| NX                                   |                 |        | 1.918±0.018        | 1.935±0.027        | 1.933±0.022        | 1.887±0.019        | Paleoprot. |
| <i>Nostocales</i>                    | 1.650           | 2.320  | 1.651 <sup>‡</sup> | 1.651 <sup>‡</sup> | 1.651 <sup>‡</sup> | 1.651 <sup>‡</sup> | Paleoprot. |
| <i>Pleurocapsales</i> +              |                 |        | 0.646±0.099        | 0.689±0.101        | 0.680±0.108        | 0.622±0.089        | Neoprot.   |
| Multitrichomous filaments            |                 |        | 1.244±0.039        | 1.270±0.050        | 1.251±0.050        | 1.193±0.041        | Mesoprot.  |
| False Branching                      |                 |        | 1.417±0.005        | n.a.               | 1.426±0.013        | 1.418±0.006        | Mesoprot.  |
| Filamentous Sheaths <sup>^</sup>     | 1.900           | 2.450  | 2.331±0.024        | 2.293±0.034        | 2.140±0.027        | 1.988±0.024        | Paleoprot. |

<sup>†</sup> Ages are in Ga, error reported is one standard deviation.

<sup>‡</sup> Estimated age abuts an age constraint, and therefore the error is near zero Ga, and the range in mean ages is the same.

+ The Pleurocapsales are not a monophyletic group; they are defined here as the clade containing *Stanieria*, *Xenococcus* and *Pleurocapsa* sp. PCC 7319.

^ Character filamentous sheaths reconstructs to slightly different locations in the tree depending on the unique taxa in each tree.
